# Supplementary material for: A 3-ketoacyl-CoA synthase 11 (KCS11) homolog from Malania oleifera synthesizes nervonic acid in plants rich in 11Z-eicosenoic acid
Source: Oxford University Press journal article supplement (doi:10.1093/treephys/tpaa125), 2020-10-01
Supplement: table_s1_tpaa125.xls [file table_s1_tpaa125.xls]

## Sheet: Sheet1
Table S1. Primer list
Primer name	Direction	Sequence (5′–3′)
FAE1 737-F	F	GVATGGGBTGYAGTGCNG
FAE1 737-R	R	CCAHACBGCACTRTTACACTTRA
KCS18 524-F	F	GGVATGGGBTGYAGTGCNGG
KCS18 524-R	R	CCWCCVGCRTGDATRCARARRTG
MoKCS11 3'RACE GSP	3′F	ATGTCCGACCGATGGCATTCTAAG
MoKCS11 3'RACE NGSP	3′F-nest	GCCCCCTTATGCTACCAATGTCT
MoKCS11 5'RACE GSP	5′R	ATCTCCTTTCTTCACCCTTCCCTT
MoKCS11 5'RACE NGSP	5′R-nest	GCTCAATGTGTTGCCAAAACGATAA
MoKCS4 3'TAIL GSP	3′F	GGAATACTTACGCAGTTGTTGTTAGC
MoKCS4 3' TAIL NGSP	3′F-nest	CTTTCGGACAAATCGGTGGACAG
MoKCS4 5'TAIL GSP	5′R	GCCTTCTGTCCACCGATTTGT
MoKCS4 5' TAIL NGSP	5′R-nest	GCTAACAACAACTGCGTAAGTATTCCTCT
AD1		NTCGASTWTSGWGTT
AD2		NGTCGASWGANAWGAA
AD3		WGTGNAGWANCANAGA
AD4		AGWGNAGWANCAWAGG
MoKCS11-F	full-F	CTGTTGTTTGCTTCAAGGGATT
MoKCS11-R	full-R	CGGCGAAACAAAGACAAGATA
MoKCS4-F	full-F	CCCATTTTCCCTCCATTATCAGA
MoKCS4-R	full-R	CCCTGAAGAAAGAGTGTCTAACTAAATC
MoGAPDH-F	full-F	CAACAGCCTTGGCAGCCCCAGT
MoGAPDH-R	full-R	CAACGGATTTGGAAGGATCGGT
MoKCS11-F2	F	GCATTCTAAGTACAAATTGGTCC
MoKCS11-R2	R	CCAAACTGCACTGTTACACTTGA
MoKCS4-F2	F	GGAATGGGTTGTAGTGCTGG
MoKCS4-R2	R	CCACACTGCACTGTTACATTTGA
BnActin-F	F	GGTGGGGATGGGGCAGAA
BnActin-R	R	CCCGCTCGGCAGTGGTG
