# Supplementary material for: A 3-ketoacyl-CoA synthase 11 (KCS11) homolog from Malania oleifera synthesizes nervonic acid in plants rich in 11Z-eicosenoic acid
Source: Oxford University Press journal article supplement (doi:10.1093/treephys/tpaa125), 2020-10-01
Supplement: table_s2_tpaa125.xls [file table_s2_tpaa125.xls]

## Sheet: Sheet1
Table S2 Programs of TAIL-PCR
Program	Number of cycles	PCR condition
Primary	1	94°C 3 min, 95°C 1 min
	5	94°C 30 s, 65°C 1 min, 72°C 2 min
	1	94°C 30 s, 25°C 2 min, 72°C 2 min, 72°C 2 min
	15	94°C 30 s, 65°C 1 min, 72°C 2 min, 94°C 30 s, 65°C 1 min, 72°C 2 min,
		94°C 30 s, 44°C 1 min, 72°C 2 min
	1	72°C 5 min
Secondary	12	94°C 30 s, 65°C 1 min, 72°C 2 min, 94°C 30 s, 65°C 1 min, 72°C 2 min,
		94°C 30 s, 44°C 1 min, 72°C 2 min
	1	72°C 5 min
